# Supplementary material
Source: publisher figshare collection journal article supplement (https://acs.figshare.com/ndownloader/files/3595494)
Supplement: Supplementary file 1 [file 3595494]

Supporting Information for:  
Quantum Behavior of Water Molecules  
Confined to Nanocavities in Gemstone

B. P. Gorshunov, E. S. Zhukova, V. I. Torgashev, V. V. Lebedev,  
G. S. Shakurov, R. K. Kremer, E. V. Pestrjakov, V. G. Thomas,  
D. A. Fursenko, and M. Dressel

## S1 Experimental Details

Beryl single crystals were grown in stainless steel autoclaves according to the regular hydro-thermal growth method at the temperature of 600°C and under pressure of 1.5 kbar by a recrystallization of natural beryl to a seed. For optical measurements a crystal of about a cubic centimeter size was x-ray oriented and cut in slices, the crystallographic  $c$ -axis was directed within the planes. This geometry allowed measuring the optical response in the two principal polarizations with the electrical vector of the probing radiation oriented parallel and perpendicular to the  $c$ -axis.

Optical measurements have been performed using two kinds of spectrometers. For infrared investigations, a standard Fourier transform spectrometer Bruker IFS-113V was used to measure the spectra of reflection and transmission coefficients,  $R(\nu)$  and  $Tr(\nu)$ . The reflectivity spectra were recorded of samples of about 1 mm thickness. For the transmission measurements thin (about 100  $\mu\text{m}$ ) samples were prepared. The same specimen was used to study the low frequency properties; here we employed a quasioptical spectrometer based on monochromatic and continuously frequency tunable radiation generators, that is, backward-wave oscillators [S1]. The arrangement as a Mach-Zehnder interferometer allows us to directly determine the spectra of complex dynamical conductivity  $\sigma^* = \sigma_1 + i\sigma_2$ , dielectric permittivity  $\epsilon^* = \epsilon' + i\epsilon''$ , etc., at frequencies from 1  $\text{cm}^{-1}$  up to 50  $\text{cm}^{-1}$ , in the temperature interval from 2 K to 300 K.

In order to identify water-related features in our spectra, we have performed optical experiments on dehydrated samples. In the course of the dehydration procedure, the beryl crystals were heated up to 1000°C in a vacuum for a period of 24 hours. The comparative analysis of optical spectra of samples with and without water (see Fig. S1) allowed us to unambiguously distinguish water related absorption resonances from those connected with phonons or impurities.

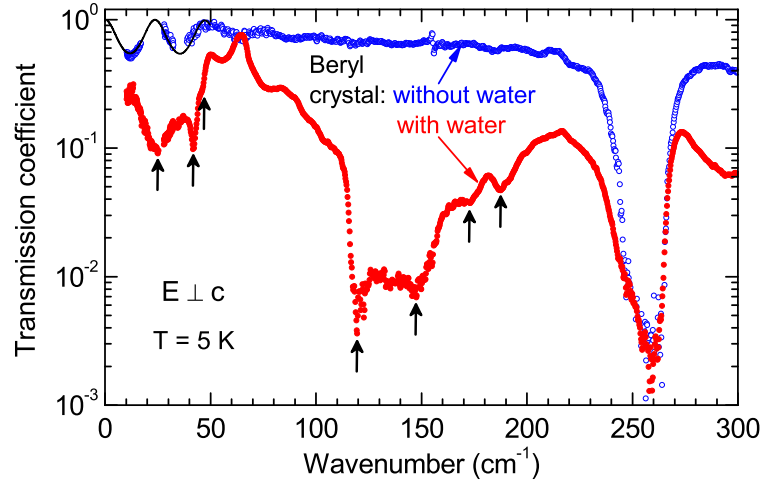

Figure S1: (Color online) Raw spectra of the transmission coefficient of a beryl crystal before (full red dots) and after dehydration (open blue dots). The 102  $\mu\text{m}$  thick specimen was measured with the electric field  $E \perp c$  at a temperature  $T = 5$  K. The black line at low frequencies gives an example of the fit to the spectra based on Fresnel's expression [Eqs. (S1) - (S4)] for transmission of a plane-parallel layer where interference effects (Fabry-Perot resonances) lead to oscillations. The water absorption (shown by the arrows) disappears after annealing in vacuum at 1000°C for 24 hours; the phonon absorption (for instance the line at 260  $\text{cm}^{-1}$ ) remains unchanged.

## S2 Data Analysis

In order to extract parameters of each resonance we have analyzed the measured  $Tr(\nu)$  and  $R(\nu)$  spectra using the Fresnel expressions for complex transmission  $Tr^*$  and reflection  $R^*$  coefficients of a plane-parallel layer [S2, S3]:

$$Tr^* = \frac{T_{12}T_{21} \exp\{i\delta\}}{1 + T_{12}T_{21} \exp\{2i\delta\}} \quad \text{and} \quad R^* = \frac{R_{12} + R_{21} \exp\{2i\delta\}}{1 + R_{12}R_{21} \exp\{2i\delta\}}. \quad (\text{S1})$$

Here

$$T_{pq} = t_{pq} \exp\{i\phi_{pq}^T\} \quad \text{and} \quad R_{pq} = r_{pq} \exp\{i\phi_{pq}^R\} \quad ; \quad (\text{S2})$$

are the Fresnel coefficients for the interfaces “air-sample”, with

$$t_{pq}^2 = \frac{4(n_p^2 + k_p^2)}{(k_p + k_q)^2 + (n_p + n_q)^2} \quad \text{and} \quad r_{pq}^2 = \frac{(n_p - n_q)^2 + (k_p - k_q)^2}{(k_p + k_q)^2 + (n_p + n_q)^2} \quad ; \quad (\text{S3})$$

$$\phi_{pq}^T = \arctan \left\{ \frac{k_p n_q - k_q n_p}{n_p^2 + k_p^2 + n_p n_q + k_p k_q} \right\} \quad \text{and} \quad \phi_{pq}^R = \arctan \left\{ \frac{2(k_p n_q - k_q n_p)}{n_p^2 + k_p^2 - n_q^2 - k_q^2} \right\}. \quad (\text{S4})$$

Here the indices  $p, q = 1, 2$  denote the material: “1” corresponds to air (refractive index  $n_1 = 1$ , extinction coefficient  $k_1 = 0$ ) and “2” corresponds to the sample ( $n_2, k_2$ ). Furthermore  $\delta = \frac{2\pi d}{\lambda}(n_2 + ik_2)$ ,  $d$  is the sample thickness,  $\lambda$  is the radiation wavelength.

Most of the observed absorption resonances can be described by the regular Lorentzian expression for the complex dielectric permittivity

$$\epsilon^*(\nu) = \epsilon'(\nu) + i\epsilon''(\nu) = \sum_j \frac{f_j}{\nu_j \gamma_j + i(\nu_j^2 - \nu^2)} \quad , \quad (\text{S5})$$

where  $\epsilon'(\nu) = n_2^2 - k_2^2$  and  $\epsilon''(\nu) = 2n_2 k_2$  are real and imaginary parts of  $\epsilon^*(\nu)$ ,  $f_j = \Delta\epsilon_j^* \nu_j^2$  is the oscillator strength of the  $j$ th resonance,  $\Delta\epsilon_j$  is its dielectric contribution,  $\nu_j$  is the resonance frequency and  $\gamma_j$  is the damping. For some resonance absorptions, however, we were not able to describe the shape of the curves in  $Tr(\nu)$  and  $R(\nu)$  spectra with the Eq. (S5). These are in particular the absorption lines located at  $120 - 160 \text{ cm}^{-1}$ . A satisfactory description could only be reached by the expression for coupled Lorentzians where the complex dielectric permittivity is written as [S4]:

$$\epsilon^*(\nu) = \frac{f_1(\nu_2^2 - \nu^2 + i\nu\gamma_2) + f_2(\nu_1^2 - \nu^2 + i\nu\gamma_1) - 2\sqrt{f_1 f_2}(\alpha + i\nu\delta)}{(\nu_1^2 - \nu^2 + i\nu\gamma_1)(\nu_2^2 - \nu^2 + i\nu\gamma_2) - (\alpha + i\nu\delta)^2} \quad (\text{S6})$$

where  $j = 1, 2$ ;  $f_j = \Delta\epsilon_j \nu_j^2$  is the oscillator strength of the  $j$ th Lorentzian with  $\nu_j$  being the eigenfrequency,  $\alpha$  is the real and  $\delta$  is the imaginary coupling constants.

We have fitted the infrared  $Tr(\nu)$  and  $R(\nu)$  spectra with the expressions (S1) through (S6) in combination with the ac conductivity and permittivity spectra measured directly at the terahertz range. In order to distinguish water-related absorptions from phonon resonances, the same procedure was applied to the spectra of dehydrated samples. The phonon resonances have been subtracted from the spectra by setting corresponding oscillator strengths in Eqs. (S5) and (S6) to zero. This allows us to eventually identify the water-related absorption lines for both principle polarizations.

### S3 Mode Assignment

The eigenfrequencies and other parameters of the infrared ground-band transitions and transitions from the ground band to the translation and the libration bands are summarized in Table S1 for the  $E \perp c$  polarization. The corresponding energies of the transitions are also indicated. The wide bump near  $25 \text{ cm}^{-1}$  in the conductivity spectrum of Figs. 2 and 5 can be ascribed to transitions between the states within the ground band. We were not able to satisfactorily reproduce the bump with one or more simple Lorentzians [Eq. (S5)] but only with a set of coupled Lorentzians [Eq. (S6)]. This complicated shape is explained by possible interconnection between populations of ground-band energy levels and also by an inhomogeneous broadening of the levels that is related to the electric field of charged impurities (metallic ions) present in the sample. The electric field randomly shifts the energy levels of the ground band due to interaction with the water molecule via its dipole moment.

Table S1: Parameters obtained from the Lorentz fit [Eq. (S5)] of the type-I water related THz and far-infrared modes observed in beryl for polarization  $E \perp c$  at  $T = 5 \text{ K}$ .  $\nu_0$  denotes the eigenfrequency,  $f$  the oscillator strength (intensity), and  $\gamma$  the damping;  $\mathcal{E}$  denotes the corresponding energy of the transition in meV. Stars mark the values obtained using the model of coupled Lorentzians Eq. (S6).

| THz and sub-THz band<br>(intra-ground-band transitions)                                   |                                 |                             |                                  |                                                   |
|-------------------------------------------------------------------------------------------|---------------------------------|-----------------------------|----------------------------------|---------------------------------------------------|
| $\mathcal{E}$<br>(meV)                                                                    | $\nu_0$<br>( $\text{cm}^{-1}$ ) | $f$<br>( $\text{cm}^{-2}$ ) | $\gamma$<br>( $\text{cm}^{-1}$ ) | Assignment<br>( $n, m$ ) $\rightarrow$ ( $n, m$ ) |
| 1.33                                                                                      | 10.7 *                          | 106 *                       | 12 *                             | (1, 0) $\rightarrow$ (1, 1)                       |
| 3.21                                                                                      | 25.9 *                          | 1 770 *                     | 25 *                             | (1, 1) $\rightarrow$ (1, 2)                       |
| 5.21                                                                                      | 42                              | 74                          | 1.5                              | ?                                                 |
| 5.82                                                                                      | 47                              | 134                         | 6                                | ?                                                 |
| Far-infrared translation band<br>(transitions between ground-band and translational band) |                                 |                             |                                  |                                                   |
| $\mathcal{E}$<br>(meV)                                                                    | $\nu_0$<br>( $\text{cm}^{-1}$ ) | $f$<br>( $\text{cm}^{-2}$ ) | $\gamma$<br>( $\text{cm}^{-1}$ ) | Assignment<br>( $n, m$ ) $\rightarrow$ ( $n, m$ ) |
| 14.01                                                                                     | 113                             | 3 320                       | 43                               | (1, 1) $\rightarrow$ (2, 0)                       |
| 14.51                                                                                     | 117 *                           | 2 960 *                     | 8 *                              | (1, 2) $\rightarrow$ (2, 1)                       |
| 18.35                                                                                     | 148 *                           | 1 860 *                     | 34 *                             | (1, 0) $\rightarrow$ (2, 1)                       |
| 21.33                                                                                     | 172                             | 900                         | 19                               | (1, 3) $\rightarrow$ (2, 2)                       |
| 23.44                                                                                     | 189                             | 780                         | 15                               | (1, 1) $\rightarrow$ (2, 2)                       |
| 27                                                                                        | 218                             | 1300                        | 42                               | (1, 2) $\rightarrow$ (2, 3)                       |
| Far-infrared libration band<br>(transitions between ground-band and librational band)     |                                 |                             |                                  |                                                   |
| $\mathcal{E}$<br>(meV)                                                                    | $\nu_0$<br>( $\text{cm}^{-1}$ ) | $f$<br>( $\text{cm}^{-2}$ ) | $\gamma$<br>( $\text{cm}^{-1}$ ) | Assignment<br>( $n, m$ ) $\rightarrow$ ( $n, m$ ) |
| 36.21                                                                                     | 292                             | 2 020                       | 34                               | (1, 1) $\rightarrow$ (2, 0)                       |
| 46.38                                                                                     | 374                             | 13 220                      | 15                               | (1, 2) $\rightarrow$ (2, 1)                       |
| 53.32                                                                                     | 430                             | 10 750                      | 14                               | (1, 0) $\rightarrow$ (2, 1)                       |
| 56.05                                                                                     | 452                             | 26 600                      | 8                                | (1, 3) $\rightarrow$ (2, 2)                       |
| 56.92                                                                                     | 459                             | 10 110                      | 5.9                              | (1, 1) $\rightarrow$ (2, 2)                       |
| 58.53                                                                                     | 472                             | 42 870                      | 9                                | (1, 2) $\rightarrow$ (2, 3)                       |

Table S2 summarizes the parameters of the water absorption lines in beryl observed for  $E \perp c$  in the infrared range around the intramolecular vibrations  $\nu_1$ ,  $\nu_2$  and  $\nu_3$  of  $\text{H}_2\text{O}$  (Fig. 3). Since the infrared satellite resonances are combinations of these internal modes  $\nu_i$  with lower frequency excitations  $\nu_j$ , we also present the correspondent differences in Table S2. Most of the differential frequencies fall below approximately  $200 \text{ cm}^{-1}$  correlating well with the peak positions related to the transitions to the translational band (Tab. S1). This suggests that the intramolecular modes of  $\text{H}_2\text{O}$  molecule most easily couple to its translational vibrations [S5]. There are few rather intensive infrared resonances that produce differential frequencies above  $200\text{--}300 \text{ cm}^{-1}$ , up to about  $530 \text{ cm}^{-1}$ . They correspond to excitations within the librational band; this suggests a coupling of  $\text{H}_2\text{O}$  internal modes to the rotational degrees of freedom. For several infrared absorptions there are no counterparts in the far-infrared or THz-subTHz ranges, presumably due to their low intensity and/or large damping.

Table S2: Parameters and assignments of water-related infrared modes in beryl obtained from the Lorentz fit [Eq. S5)] for the polarization  $E \perp c$  at  $T = 5$  K. As in Table S1,  $\mathcal{E}$  denotes the energy of the transition,  $\nu_0$  the corresponding eigenfrequency,  $f$  is the oscillator strength, and  $\gamma$  the damping. The bold lines correspond to the internal vibrations  $\nu_1$ ,  $\nu_2$  and  $\nu_3$  of  $\text{H}_2\text{O}$ . Differences between positions of  $\nu_1$ ,  $\nu_2$  and  $\nu_3$  and the observed modes are also presented.

| Infrared modes around of internal $\text{H}_2\text{O}$ mode |                                 |                             |                                  |                                             |  |
|-------------------------------------------------------------|---------------------------------|-----------------------------|----------------------------------|---------------------------------------------|--|
| $\nu_2 = 1595 \text{ cm}^{-1}$                              |                                 |                             |                                  |                                             |  |
| $\mathcal{E}$<br>(meV)                                      | $\nu_0$<br>( $\text{cm}^{-1}$ ) | $f$<br>( $\text{cm}^{-2}$ ) | $\gamma$<br>( $\text{cm}^{-1}$ ) | $ \nu_2^I - \nu_0 $<br>( $\text{cm}^{-1}$ ) |  |
| <b>197.3</b>                                                | <b>1 591</b>                    | <b>695</b>                  | <b>7.4</b>                       | $\nu_2$ , Water-I                           |  |
| 197.7                                                       | 1 594                           | 84                          | 2.6                              | 3                                           |  |
| 198.0                                                       | 1 597                           | 215                         | 5                                | 6                                           |  |
| 199.9                                                       | 1 612                           | 857                         | 29                               | 21                                          |  |
| 202.7                                                       | 1 634                           | 190                         | 25                               | 43                                          |  |
| 212.0                                                       | 1 710                           | 29                          | 12                               | 119                                         |  |

  

| Infrared modes around the internal $\text{H}_2\text{O}$ modes     |                                 |                             |                                  |                                             |                                                |
|-------------------------------------------------------------------|---------------------------------|-----------------------------|----------------------------------|---------------------------------------------|------------------------------------------------|
| $\nu_1 = 3657 \text{ cm}^{-1}$ and $\nu_3 = 3756 \text{ cm}^{-1}$ |                                 |                             |                                  |                                             |                                                |
| $\mathcal{E}$<br>(meV)                                            | $\nu_0$<br>( $\text{cm}^{-1}$ ) | $f$<br>( $\text{cm}^{-2}$ ) | $\gamma$<br>( $\text{cm}^{-1}$ ) | $ \nu_1^I - \nu_0 $<br>( $\text{cm}^{-1}$ ) | $ \nu_3^{II} - \nu_0 $<br>( $\text{cm}^{-1}$ ) |
| 389.9                                                             | 3 144                           | 32                          | 14                               | 461                                         | 528                                            |
| 446.2                                                             | 3 598                           | 80                          | 12                               | 7                                           | 74                                             |
| <b>446.9</b>                                                      | <b>3 604</b>                    | <b>277</b>                  | <b>0.8</b>                       | $\nu_1$ , Water-I                           |                                                |
| 449.5                                                             | 3 625                           | 70                          | 52                               | 20                                          | 47                                             |
| 453.7                                                             | 3 659                           | 57                          | 4                                | 54                                          | 13                                             |
| 454.3                                                             | 3 664                           | 270                         | 8                                | 59                                          | 8                                              |
| 454.8                                                             | 3 668                           | 70                          | 4.4                              | 63                                          | 4                                              |
| 455.1                                                             | 3 670                           | 15                          | 1.8                              | 65                                          | 2                                              |
| <b>455.3</b>                                                      | <b>3 672</b>                    | <b>342</b>                  | <b>6.6</b>                       | $\nu_3$ , Water-II                          |                                                |
| 455.7                                                             | 3 675                           | 36                          | 3                                | 71                                          | 3                                              |
| 456.0                                                             | 3 677                           | 225                         | 5.5                              | 73                                          | 5                                              |
| 457.1                                                             | 3 686                           | 136                         | 5                                | 82                                          | 14                                             |
| 458.7                                                             | 3 699                           | 20                          | 3                                | 95                                          | 27                                             |
| 461.8                                                             | 3 724                           | 144                         | 20                               | 120                                         | 52                                             |
| 463.9                                                             | 3 741                           | 4                           | 7                                | 137                                         | 69                                             |
| 465.4                                                             | 3 753                           | 183                         | 22                               | 149                                         | 81                                             |
| 479.4                                                             | 3 866                           | 40                          | 13                               | 262                                         | 194                                            |
| 483.0                                                             | 3 895                           | 250                         | 30                               | 291                                         | 223                                            |
| 486.1                                                             | 3 920                           | 60                          | 15                               | 316                                         | 248                                            |
| 653.5                                                             | 5 270                           | 50                          | 7                                | 1 665                                       | 1 598                                          |

In contrast to the  $E \perp c$  polarization, the experimental spectra for  $E \parallel c$  are rather poor: only two resonances are seen at 5 K in the far-infrared and THz frequency range (Fig. 2), and just two satellite peaks accompany the H<sub>2</sub>O intramolecular modes (Fig. 3) with their parameters given in Table S3.

Table S3: Parameters obtained from the Lorentz fit [Eq. (S5)] of the type-I water related modes observed in beryl for polarization  $E \parallel c$  at  $T = 5$  K.  $\nu_0$  denotes the eigenfrequency,  $f$  the oscillator strength (intensity), and  $\gamma$  the damping;  $\mathcal{E}$  denotes the corresponding energy of the transition in meV. For the infrared range, spectral distances are presented with respect to the positions of the intramolecular water vibrations; i.e. differences between of the observed modes and  $\nu_1$ ,  $\nu_2$  and  $\nu_3$ .

| THz and sub-THz band                                                                                                             |                                |                            |                                 |                                                      |
|----------------------------------------------------------------------------------------------------------------------------------|--------------------------------|----------------------------|---------------------------------|------------------------------------------------------|
| $\mathcal{E}$<br>(meV)                                                                                                           | $\nu_0$<br>(cm <sup>-1</sup> ) | $f$<br>(cm <sup>-2</sup> ) | $\gamma$<br>(cm <sup>-1</sup> ) | Assignment                                           |
| 10.91                                                                                                                            | 88                             | 200                        | 4                               | Water-I. Translational mode                          |
| 19.6                                                                                                                             | 158                            | 2 780                      | 22                              | Water-I. Librational mode                            |
| Infrared modes around the internal H <sub>2</sub> O mode<br>$\nu_2 = 1595$ cm <sup>-1</sup>                                      |                                |                            |                                 |                                                      |
| $\mathcal{E}$<br>(meV)                                                                                                           | $\nu_0$<br>(cm <sup>-1</sup> ) | $f$<br>(cm <sup>-2</sup> ) | $\gamma$<br>(cm <sup>-1</sup> ) | $ \nu_2^{II} - \nu_0 $<br>(cm <sup>-1</sup> )        |
| 197.2                                                                                                                            | 1 590                          | 21                         | 1.7                             | 32                                                   |
| 201.1                                                                                                                            | 1 622                          | 12 450                     | 0.7                             | $\nu_2$ , Water-II                                   |
| 220.7                                                                                                                            | 1 780                          | 82                         | 37                              | 158                                                  |
| Infrared modes around the internal H <sub>2</sub> O modes<br>$\nu_1 = 3657$ cm <sup>-1</sup> and $\nu_3 = 3756$ cm <sup>-1</sup> |                                |                            |                                 |                                                      |
| $\mathcal{E}$<br>(meV)                                                                                                           | $\nu_0$<br>(cm <sup>-1</sup> ) | $f$<br>(cm <sup>-2</sup> ) | $\gamma$<br>(cm <sup>-1</sup> ) | Assignment                                           |
| 446.3                                                                                                                            | 3 599                          | 955                        | 5.5                             | $\nu_1$ , Water-II                                   |
| 458.3                                                                                                                            | 3 696                          | 490                        | 5.6                             | $\nu_3$ , Water-I                                    |
| 653.4                                                                                                                            | 5 269                          | 95                         | 2.9                             | $\nu_1 + \nu_2 = 5 221$ cm <sup>-1</sup><br>Water-II |

## References

- [S1] Gorshunov, B.; Volkov, A.; Spektor, I.; Prokhorov, A.; Mukhin, A.; Dressel, M.; Uchida, S.; Loidl, A. *Int. J. of Infrared and Millimeter Waves* **2005**, *26*, 1217-1240.
- [S2] Born, M.; Wolf, E. *Principles of Optics*, 7th edition, Cambridge University Press, Cambridge, **1999**.
- [S3] Dressel M.; Grüner, G. *Electrodynamics of Solids*, Cambridge University Press, Cambridge, **2002**.
- [S4] Barker, A. S.; Hopfield, J. J. *Phys. Rev.* **1964**, *135*, A1732-A1737.
- [S5] Kolesov, B. A.; *J. Struct. Chem.* **2006**, *47*, 21-34.
